# Supplementary material
Source: publisher site journal article supplement (https://www.dovepress.com/article/451350)
Supplement: Supplementary file 1 [file get_supplementary_file.php]

**Supplementary table 1.** Baseline data of participants with IQR of DII scores

| **Variable** | **DII Scores** | | | | **χ²** | **p-value** |
| --- | --- | --- | --- | --- | --- | --- |
| **≤ Q 1** | **Q 1 - Q 2** | **Q 2 - Q 3** | **> Q 3** |
| Number of Patients | 289 | 292 | 291 | 290 |  |  |
| Age (Q2, 〔Q1, Q3〕) | 51〔42.5, 48〕 | 50 〔38, 58.75〕 | 52 〔44， 59〕 | 52〔42.75， 58〕 | 6.766 | 0.080 |
| BMI (Q2, 〔Q1, Q3〕) | 22.04〔19.99, 24.52〕 | 22.54 〔19.98, 24.48〕 | 22.49 〔20.43， 24.84〕 | 22.86 〔22.04， 25.54〕 | 4.435 | 0.218 |
| Female n(%) | 142(49.1) | 146(50.0) | 112(38.5) | 130(44.8) | 9.738 | 0.021 |
| Race n(%) |  |  |  |  | 1.081 | 0.782 |
| Han | 267(92.4) | 276(94.5) | 272(93.5) | 271(93.4) |  |  |
| Others | 14(7.6) | 10(5.5) | 11(6.5) | 13(6.6) |  |  |
| Marriage n(%) |  |  |  |  | 15.151 | 0.087 |
| Unmarried | 13(4.5) | 27(9.2) | 14(4.8) | 15(5.2) |  |  |
| Married | 263(91.0) | 252(86.3) | 267(91.8) | 260(89.7) |  |  |
| Divorced | 5(1.7) | 9(3.1) | 3(1.0) | 4(1.4) |  |  |
| Widowed | 8(2.8) | 4(1.4) | 7(2.4) | 11(3.8) |  |  |
| Residence n(%) |  |  |  |  | 22.647 | 0.001 |
| City | 138(47.8) | 156(53.4) | 175(60.1) | 190(65.5) |  |  |
| Township | 50(17.3) | 46(15.8) | 43(14.8) | 29(10.0) |  |  |
| Rural | 101(34.9) | 90(30.8) | 73(25.1) | 71(24.5) |  |  |
| Character n(%) |  |  |  |  | 16.957 | 0.009 |
| Introverted | 79(27.3) | 104(35.6) | 113(38.8) | 125(43.1) |  |  |
| Intermediate | 136(47.1) | 118(40.4) | 112(38.5) | 105(36.2) |  |  |
| Extrovert | 74(27.4) | 70(24.0) | 66(22.7) | 60(20.7) |  |  |
| Education n(%) |  |  |  |  | 9.592 | 0.143 |
| Primary School | 81（28.0） | 65（22.3） | 73（25.1） | 58（20.0） |  |  |
| Middle School | 123（42.6） | 123（42.1） | 113（38.8） | 138（47.6） |  |  |
| University and Above | 85（29.4） | 104（35.6） | 105（36.1） | 94(32.4) |  |  |
| Blood Type n(%) |  |  |  |  | 10.441 | 0.577 |
| A | 32(11.1) | 36(12.3) | 40(13.7) | 38(13.1) |  |  |
| B | 40(13.8) | 51(17.5) | 43(14.8) | 42(14.5) |  |  |
| O | 54(18.7) | 52(17.8) | 45(15.5) | 54(18.6) |  |  |
| AB | 29(10.0) | 22(7.5) | 15(5.2) | 17(5.9) |  |  |
| Unknown | 134(46.4) | 131(44.9) | 148(50.9) | 139(47.9) |  |  |
| Profession n(%) |  |  |  |  | 62.776 | <0.001 |
| Students | 13(4.5) | 9(3.1) | 2(0.7) | 10(3.4) |  |  |
| Farmers | 114(39.4) | 107(36.6) | 92(31.6) | 85(29.3) |  |  |
| Herdsmen | 5(1.7) | 1(0.3) | 3(1.0) | 1(0.3) |  |  |
| Civil servants | 20(6.9) | 29(9.9) | 37(12.7) | 42(14.5) |  |  |
| Medical staff | 6(2.1) | 5(1.7) | 2(0.7) | 8(2.8) |  |  |
| Teacher | 24(8.3) | 18(6.2) | 20(6.9) | 14(4.8) |  |  |
| Commercial / Catering Industry | 19(6.6) | 22(7.5) | 17(5.8) | 27(9.3) |  |  |
| Professional and technical personnel | 16(5.5) | 21(7.2) | 21(7.2) | 19(6.6) |  |  |
| Retirees | 27(9.3) | 28(9.6) | 59(20.3) | 54(18.6) |  |  |
| Others | 45(15.6) | 52(17.8) | 38(13.1) | 30(10.3) |  |  |
| Income (RMB) n(%) |  |  |  |  | 14.330 | 0.111 |
| <2000 | 108(37.4) | 92(31.5) | 87(29.9) | 87(30.0) |  |  |
| 2000-5000 | 121(41.9) | 115(39.4) | 127(43.6) | 111(38.3) |  |  |
| 5000-10000 | 49(17.0) | 59(20.2) | 54(18.6) | 66(22.8) |  |  |
| >10000 | 11(3.8) | 26(8.9) | 23(7.9) | 26(9.0) |  |  |
| Main Drinking Water n(%) |  |  |  |  | 4.492 | 0.610 |
| Tap Water | 246(85.1) | 250(85.6) | 242(83.2) | 246(84.8) |  |  |
| Well Water | 34(11.8) | 36(12.3) | 41(14.1) | 31(10.7) |  |  |
| Rivers and Lakes | 9(3.1) | 6(2.1) | 8(2.7) | 13(4.5) |  |  |
| Family History of Stomach Cancer n(%) | 31(10.7) | 33(11.3) | 33(11.3) | 43(14.8) | 2.882 | 0.410 |
| *Hp* infection n(%) | 131(45.3) | 135(46.2) | 154(52.9) | 159(54.8) | 7.863 | 0.049 |
| Smoking status n(%) |  |  |  |  | 8.327 | 0.040 |
| Never smoker | 182(63.0) | 207(70.9) | 174(59.8) | 186(64.1) |  |  |
| Past smoker or Current smoker | 107(37.0) | 85(29.1) | 117(40.2) | 104(35.9) |  |  |

Note: Statistical analyses were performed on the age and BMI variables using the Kruskal Wallis H-rank sum test, while the other variables were tested using the chi-square test. A statistically significant difference was defined as p-value < 0.05.

Q1= -0.433; Q2= -0.190, Q3= 0.609.

Abbreviations: DII: Dietary Inflammatory Index; IQR: interquartile range; BMI: body mass index; RMB: Rén mín bì’; *HP: Helicobacter pylori;*

Q1: First quartile; Q2: Second quartile; Q3: Third quartile.

**Supplementary Table 2.** General clinical data of anti-inflammatory group and pro-inflammatory group

| **Variable** | **anti-inflammatory group**  **(n = 761)** | **pro-inflammatory group**  **(n = 401)** | **Z/ χ²** | **p-value** |
| --- | --- | --- | --- | --- |
| Age (Q2, 〔Q1, Q3〕) | 51(43, 58) | 51(42, 59) | -0.791 | 0.429 |
| BMI (Q2, 〔Q1, Q3〕) | 22.32(20.00, 24.58) | 22.59(20.31, 25.37) | -2.034 | 0.042 |
| Female n(%) | 355(46.6) | 406(43.6) | 0.958 | 0.328 |
| Race n(%) |  |  | 0.094 | 0.759 |
| Han | 710(93.3) | 376(93.9) |  |  |
| Others | 51(6.7) | 25(6.1) |  |  |
| Marriage n(%) |  |  | 3.665 | 0.300 |
| Unmarried | 50(6.6) | 19(4.7) |  |  |
| Married | 678(89.1) | 364(90.8) |  |  |
| Divorced | 16(2.1) | 5(1.2) |  |  |
| Widowed | 17(2.2) | 13(3.2) |  |  |
| Residence n(%) |  |  | 16.636 | <0.001 |
| City | 400(52.6) | 259(64.6) |  |  |
| Township | 126(16.6) | 42(10.5) |  |  |
| Rural | 235(30.9) | 100(24.9) |  |  |
| Character n(%) |  |  | 13.285 | 0.001 |
| Introverted | 248(22.6) | 173(43.1) |  |  |
| Intermediate | 331(43.5) | 140(34.9) |  |  |
| Extrovert | 182(23.9) | 88(21.9) |  |  |
| Education n(%) |  |  | 2.359 | 0.307 |
| Primary School | 192（25.2） | 85（21.2） |  |  |
| Middle School | 319（41.9） | 178（44.4） |  |  |
| University and Above | 250（32.9） | 138(34.4) |  |  |
| Blood Type n(%) |  |  | 8.370 | 0.079 |
| A | 93(12.2) | 53(13.2) |  |  |
| B | 121(15.9) | 55(13.7) |  |  |
| O | 128(16.8) | 77(19.2) |  |  |
| AB | 65(8.5) | 18(4.5) |  |  |
| Unknown | 354(46.5) | 198(49.4) |  |  |
| Profession n(%) |  |  | 27.822 | 0.001 |
| Students | 23(3.0) | 11(2.7) |  |  |
| Farmers | 277(36.4) | 121(30.2) |  |  |
| Herdsmen | 7(0.9) | 3(0.7) |  |  |
| Civil servants | 70(9.2) | 58(14.5) |  |  |
| Medical staff | 12(1.6) | 9(2.2) |  |  |
| Teacher | 56(7.4) | 20(5.0) |  |  |
| Commercial / Catering Industry | 48(6.3) | 37(9.2) |  |  |
| Professional and technical personnel | 52(6.8) | 25(6.2) |  |  |
| Retirees | 94(12.4) | 74(18.5) |  |  |
| Others | 122(16.0) | 43(10.7) |  |  |
| Income (RMB) n(%) |  |  | 5.815 | 0.121 |
| <2000 | 258(33.9) | 116(28.9) |  |  |
| 2000-5000 | 309(40.6) | 165(41.1) |  |  |
| 5000-10000 | 146(19.2) | 82(20.4) |  |  |
| >10000 | 48(6.3) | 38(9.5) |  |  |
| Main Drinking Water n(%) |  |  | 4.005 | 0.135 |
| Tap Water | 648(85.2) | 336(83.8) |  |  |
| Well Water | 95(12.5) | 47(11.7) |  |  |
| Rivers and Lakes | 18(2.4) | 18(4.5) |  |  |
| Family History of Stomach Cancer n(%) | 80(10.5) | 60(15.0) | 4.908 | 0.027 |
| *Hp* infection n(%) | 376(64.9) | 203(48.2) | 0.155 | 0.694 |
| Smoking status n(%) |  |  | 0.929 | 0.335 |
| Never smoker | 498(65.4) | 251(62.6) |  |  |
| Past smoker or Current smoker | 263(34.6) | 150(37.4) |  |  |

Note: Statistical analyses were performed on the age and BMI variables using the Mann-Whitney U test, while the other variables were tested using the chi-square test. A statistically significant difference was defined as p-value < 0.05.

The anti-inflammatory diet is characterized by a DII score greater than zero, while the pro-inflammatory diet is characterized by a DII score less than zero.

Abbreviations: DII: Dietary Inflammatory Index; IQR: interquartile range; BMI: body mass index; RMB: Rén mín bì’; *HP: Helicobacter pylori;*

Q1: First quartile; Q2: Second quartile; Q3: Third quartile.
